# Supplementary material for: Enhanced antitumor effects by combining an IL-12/anti-DNA fusion protein with avelumab, an anti-PD-L1 antibody
Source: PubMed Central journal article supplement (PMC5400526; doi:10.18632/oncotarget.16137), 2017-03-11
Supplement: oncotarget-08-20558-s001.pdf [file oncotarget-08-20558-s001.pdf]

## Enhanced antitumor effects by combining an IL-12/anti-DNA fusion protein with avelumab, an anti-PD-L1 antibody

### Supplementary Material

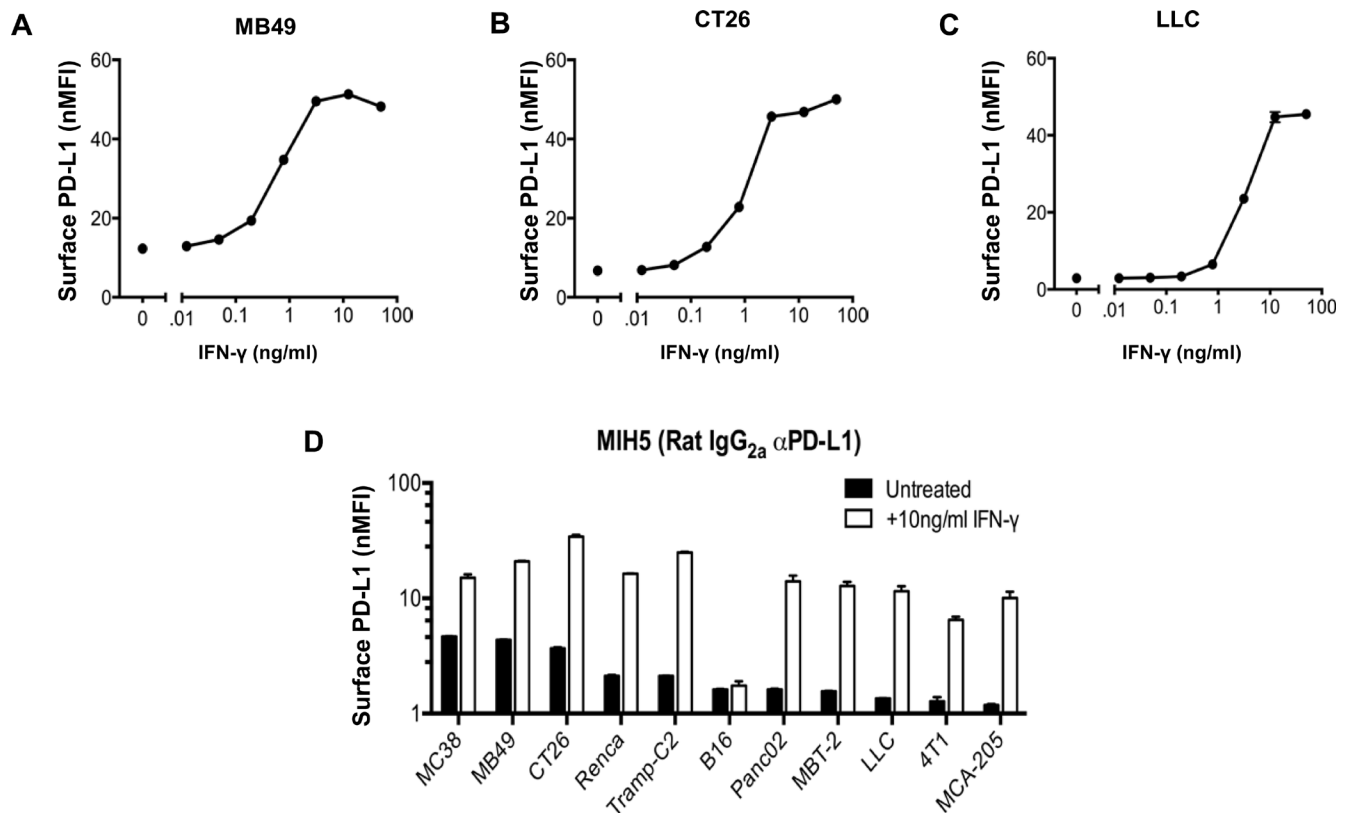

**Supplementary Figure S1: Dose-dependent increase in binding of a human anti-PD-L1 antibody to mouse tumor cells following IFN- $\gamma$  treatment.** (A) MB49, (B) CT26, and (C) LLC mouse tumor cells were grown *in vitro* for 2 days in the presence of 0-50 ng/ml IFN- $\gamma$ . The cells were then surface-labeled with HuIgG<sub>1</sub> or a human anti-PD-L1 antibody (0.2mg/10<sup>6</sup> cells) and a PE-conjugated goat anti-human IgG secondary antibody (0.5mg/10<sup>6</sup> cells). (D) Murine tumor cells were grown *in vitro* for 2 days with or without 10ng/ml IFN- $\gamma$ . For each cell line, the normalized median fluorescence intensity (nMFI) was calculated as the ratio of a human anti-PD-L1 antibody binding (MFI) to HuIgG<sub>1</sub> control binding (MFI) to the tumor cell surface. Bars represent the nMFI  $\pm$ SD of duplicate samples for each condition.

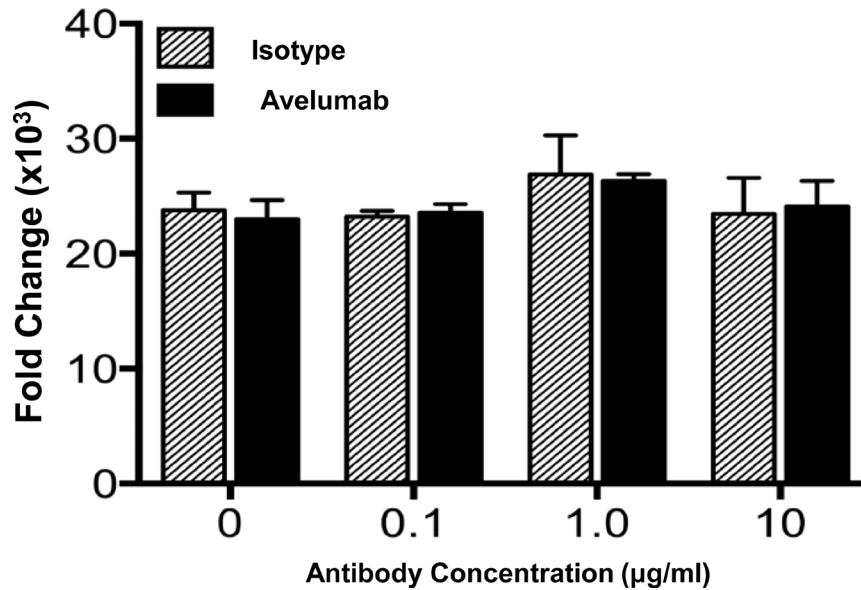

**Supplementary Figure S2: *In vitro* tumor cell growth in the presence of a human anti-PD-L1 antibody.** MC38 cells were seeded in 75cm<sup>2</sup> flasks at a density of 500 cells per flask. One day later, HuIgG<sub>1</sub> control or a human anti-PD-L1 antibody was added at a concentration of 0, 0.1, 1.0, or 10mg/ml. After 6 days of co-incubation with antibody, the cells were trypsinized, washed, and counted. The fold change was calculated as (final cell count) / (starting cell count). Bar graphs represent the fold change  $\pm$ SD of triplicate samples.

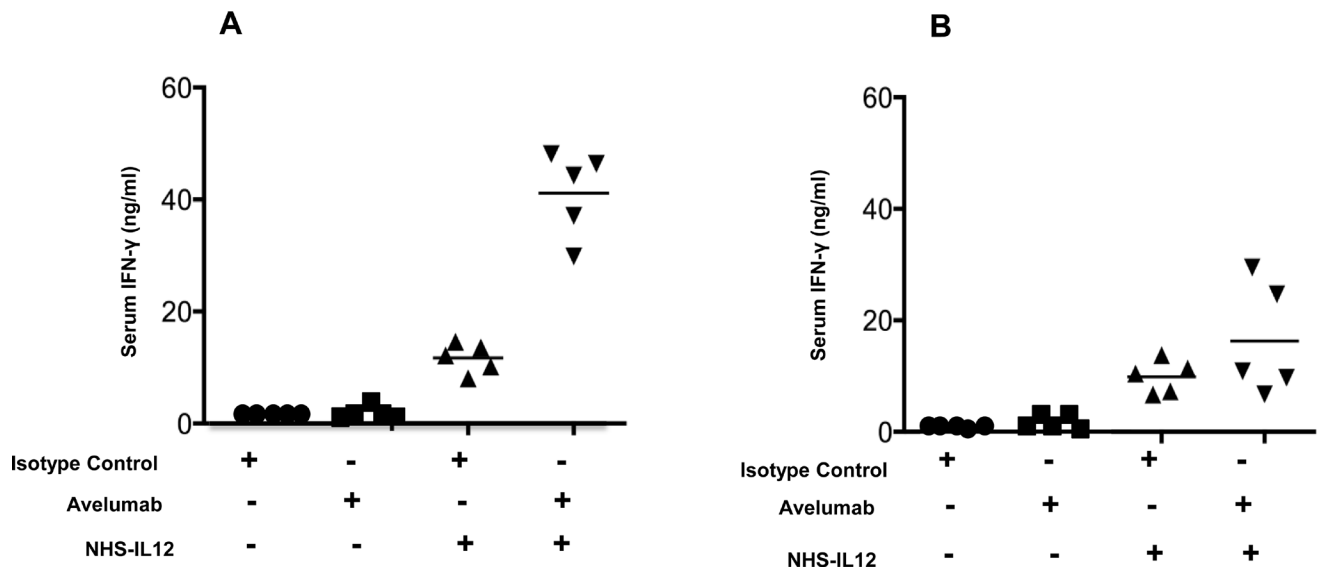

**Supplementary Figure S3: Serum IFN- $\gamma$  measurement.** MC38 s.c. tumor-bearing C57BL/6 mice were randomized ( $n= 10$ /group) and treated with 3x400mg HuIgG<sub>1</sub> alone, 3x400mg human anti-PD-L1, 3x400mg HuIgG<sub>1</sub> plus 3x2mg NHS-muIL12, or 3x400mg anti-PD-L1 plus 3x2mg NHS-muIL12 on days 8 and 10 post-tumor inoculation. Serum samples from each mouse were taken 48 hrs (A) and 72 hrs (B) after the last treatment and IFN- $\gamma$  levels were determined as outlined in the Materials and Methods. Each data point represents a single mouse and the horizontal bar the mean from each of the treatment groups.
